# Supplementary material for: Construction of an odds model of coronary heart disease using published information: the Cardiovascular Health Improvement Model (CHIME)
Source: Springer Nature journal article supplement (doi:10.1186/1472-6947-8-49), 2008-10-31

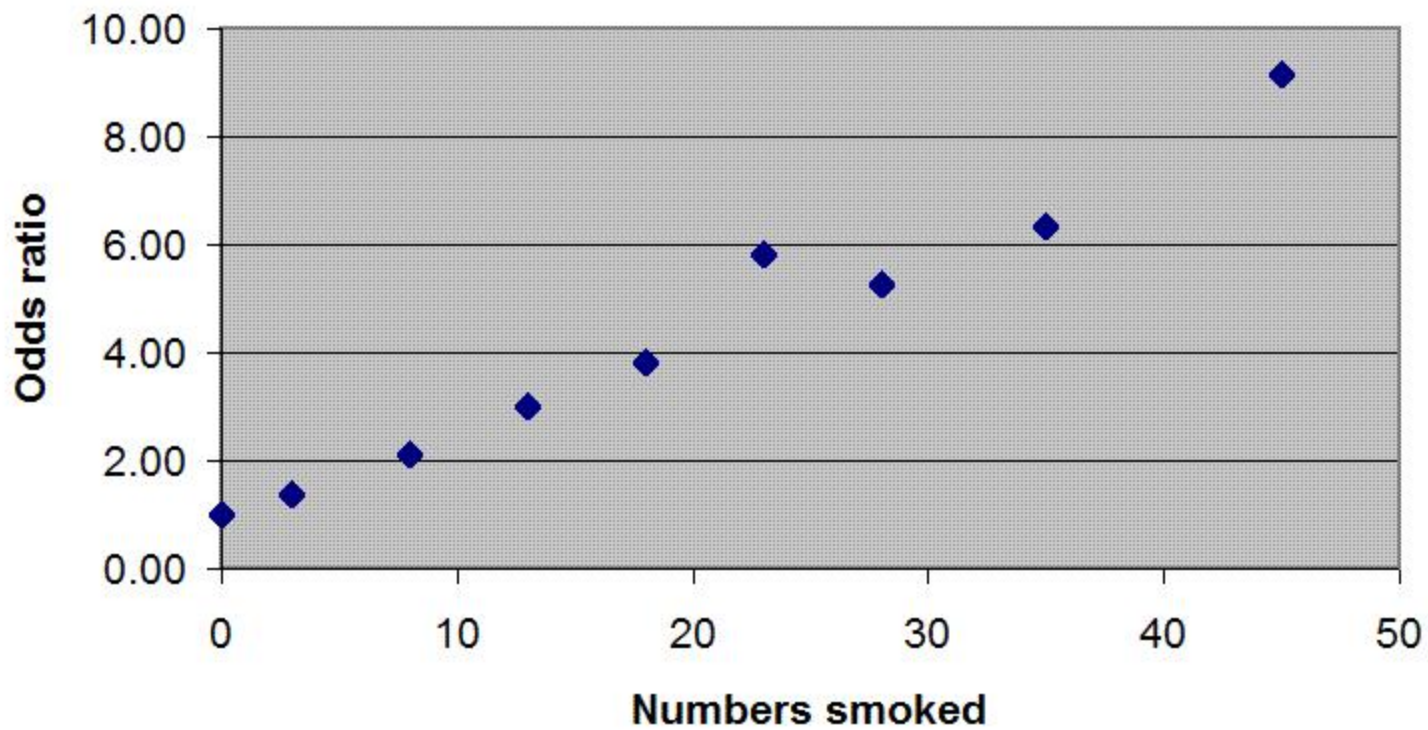

Supplement: 12911_2008_221_MOESM4_ESM.pdf [file 12911_2008_221_MOESM4_ESM.pdf]
